# Supplementary material for: CDX1 and CDX2 suppress colon cancer stemness by inhibiting β-catenin-facilitated formation of Pol II–DSIF–PAF1C complex
Source: Springer Nature journal article supplement (doi:10.1038/s41419-025-07737-3), 2025-05-21
Supplement: MOESM1 [file 41419_2025_7737_MOESM1_ESM.pdf]

## **Supplementary Data**

### **CDX1 and CDX2 suppress colon cancer stemness by inhibiting $\beta$ -catenin-facilitated formation of Pol II–DSIF–PAF1C complex**

Koji Aoki<sup>1,2,\*</sup>, Akari Nitta<sup>1</sup> and Ayumi Igarashi<sup>1</sup>

<sup>1</sup> Department of Pharmacology, Faculty of Medicine, University of Fukui, Fukui, Japan

<sup>2</sup> Life Science Support Center, University of Fukui, Fukui, Japan

#### **\* Correspondence:**

Koji Aoki

Department of Pharmacology, Faculty of Medicine, University of Fukui, 23-3, Matsuokashimoaizuki, Eiheiji-cho, Yoshida-gun, Fukui 910-1193, Japan.

Phone: 81-776-61-8326; Fax: 81-776-61-8130; E-mail: aokik@u-fukui.ac.jp

Supplementary Figures 1-10

Supplementary Tables 1-3

Supplementary figure S1

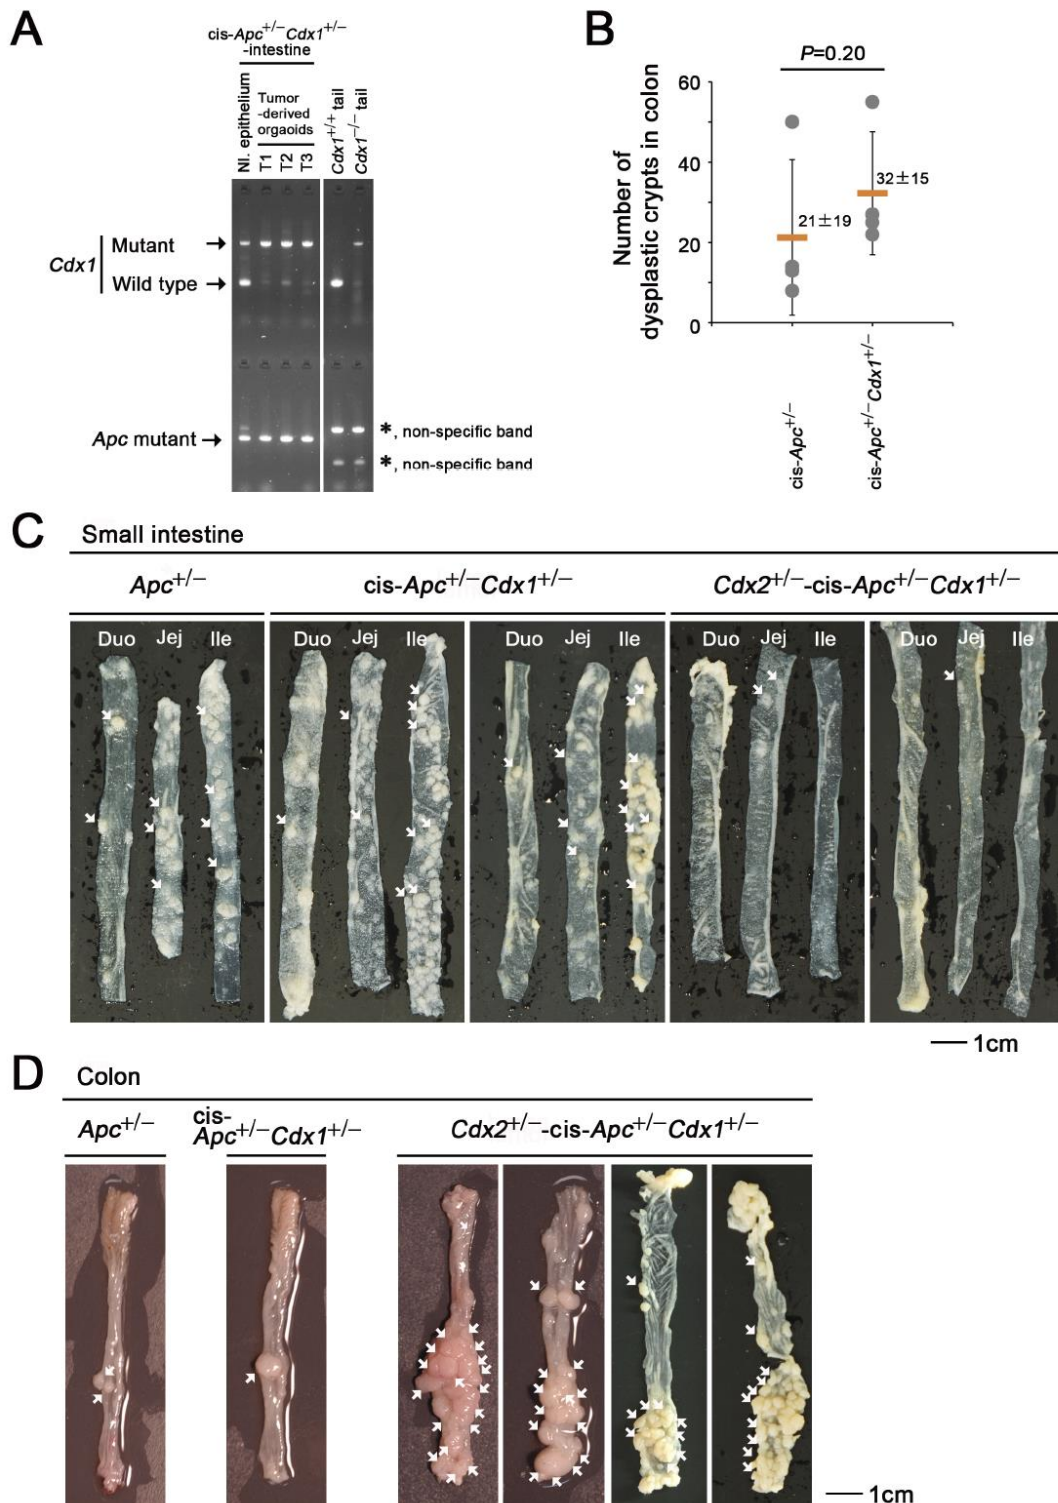

**Supplementary Fig. S1: Intestinal tumors in *Apc<sup>+/-</sup>*, *cis-Apc<sup>+/-</sup>-Cdx1<sup>+/-</sup>* and *Cdx2<sup>+/-</sup>-cis-Apc<sup>+/-</sup>-Cdx1<sup>+/-</sup>* mice.**

**(A)** Gel images of PCR-amplified wild-type and mutant *Cdx1* and *Apc* genes in

organoid cells derived from the colonic tumors of *cis-Apc<sup>+/-</sup>Cdx1<sup>+/-</sup>* mice. DNA extracted from the tails of *Cdx1<sup>+/+</sup>* and *Cdx1<sup>-/-</sup>* mice was used as positive control for PCR analysis. The asterisk denotes non-specific bands.

**(B)** The number of dysplastic crypts in *Apc<sup>+/-</sup>* and *cis-Apc<sup>+/-</sup>Cdx1<sup>+/-</sup>* mouse colons at 10 weeks of age (mean  $\pm$  SD, n = 4). *P*-value was calculated using a Student's *t*-test.

**(C and D)** Dissection micrographs of small intestines **(C)** and colons **(D)** from *Apc<sup>+/-</sup>* (left), *cis-Apc<sup>+/-</sup>Cdx1<sup>+/-</sup>* (center), and *Cdx2<sup>+/-</sup>-cis-Apc<sup>+/-</sup>Cdx1<sup>+/-</sup>* (right) mice at 10–12 weeks of age. The white arrows indicate large tumors. Scale bars, 1 cm.

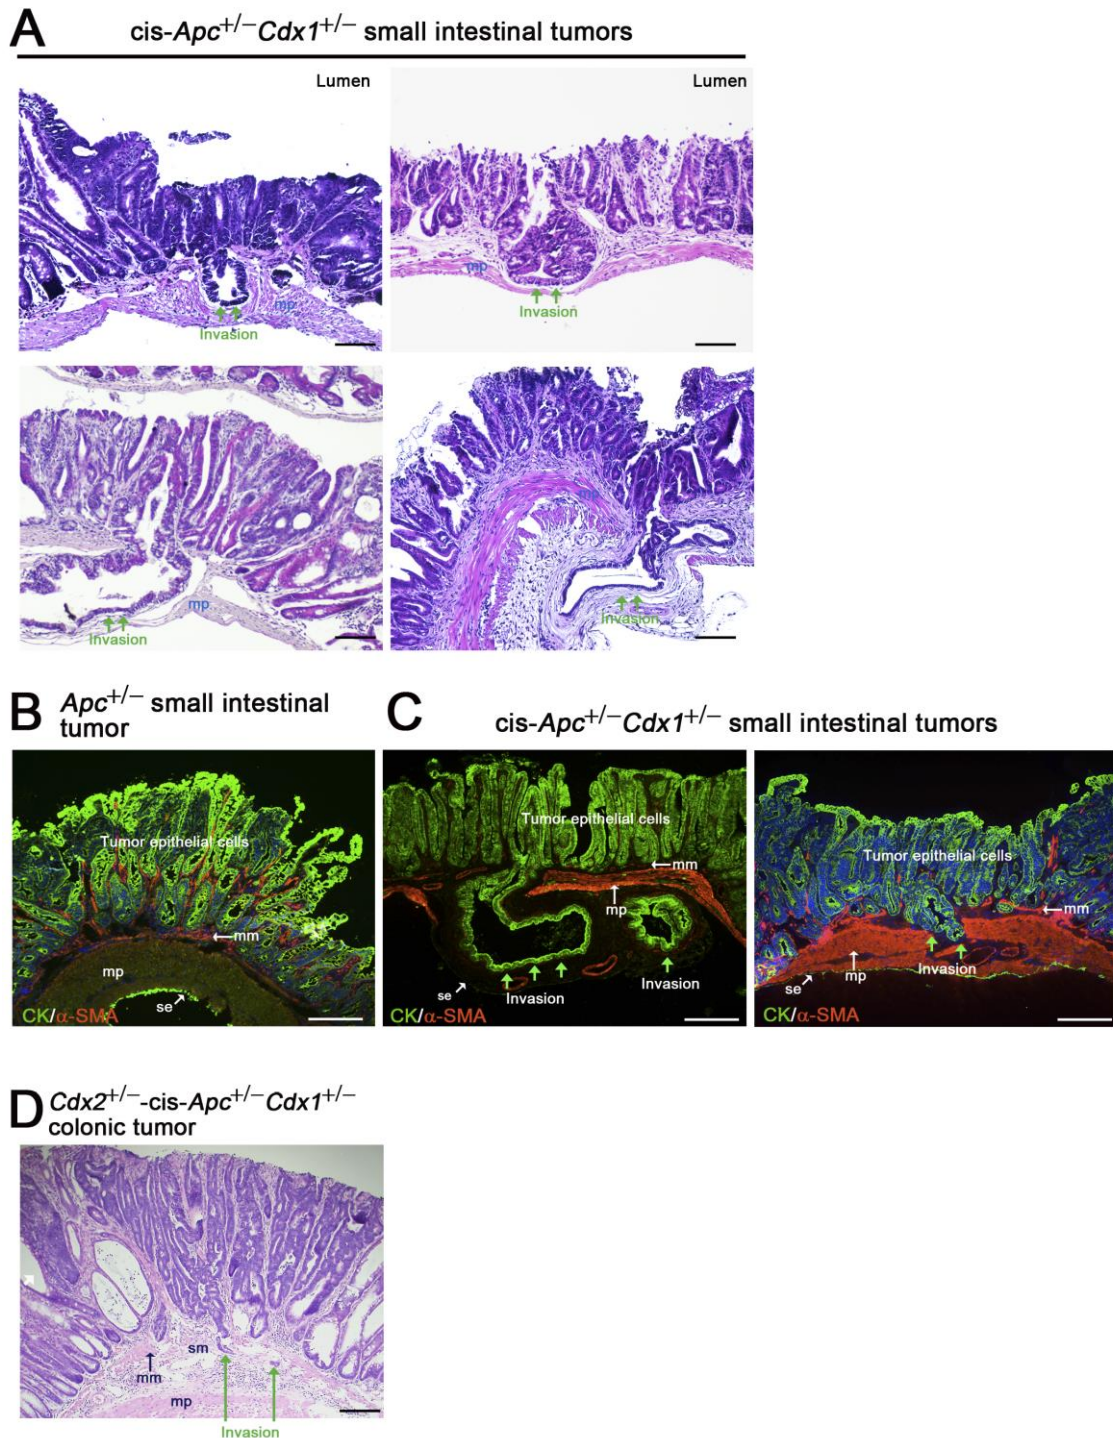

**Supplementary Fig. S2: Suppression of malignant progression of colonic tumorigenesis by Cdx1 and Cdx2.**

**(A)** Optical micrographs showing H&E-stained small intestinal tumors in *cis-Apc<sup>+/-</sup>Cdx1<sup>+/-</sup>* mice. Green arrows indicate invasive tumor cells (**A**, **C**, **D**).

*Abbreviations* in **A–D**: mm, muscularis mucosa; mp, muscularis propria; se, serosa. The polyps were also stained with DAPI (blue). Scale bars, 200  $\mu$ m (**A–D**).

**(B and C)** Fluorescence micrographs of cytokeratin (CK: green) and  $\alpha$ -smooth muscle actin ( $\alpha$ -SMA: red) present in small intestinal tumors in *Apc*<sup>+/-</sup> (**B**) and *cis-Apc*<sup>+/-</sup> *Cdx1* mice (**C**).

**(D)** Optical micrographs showing an H&E-stained colonic tumor from a *Cdx2*<sup>+/-</sup> *cis-Apc*<sup>+/-</sup> *Cdx1*<sup>+/-</sup> mouse.

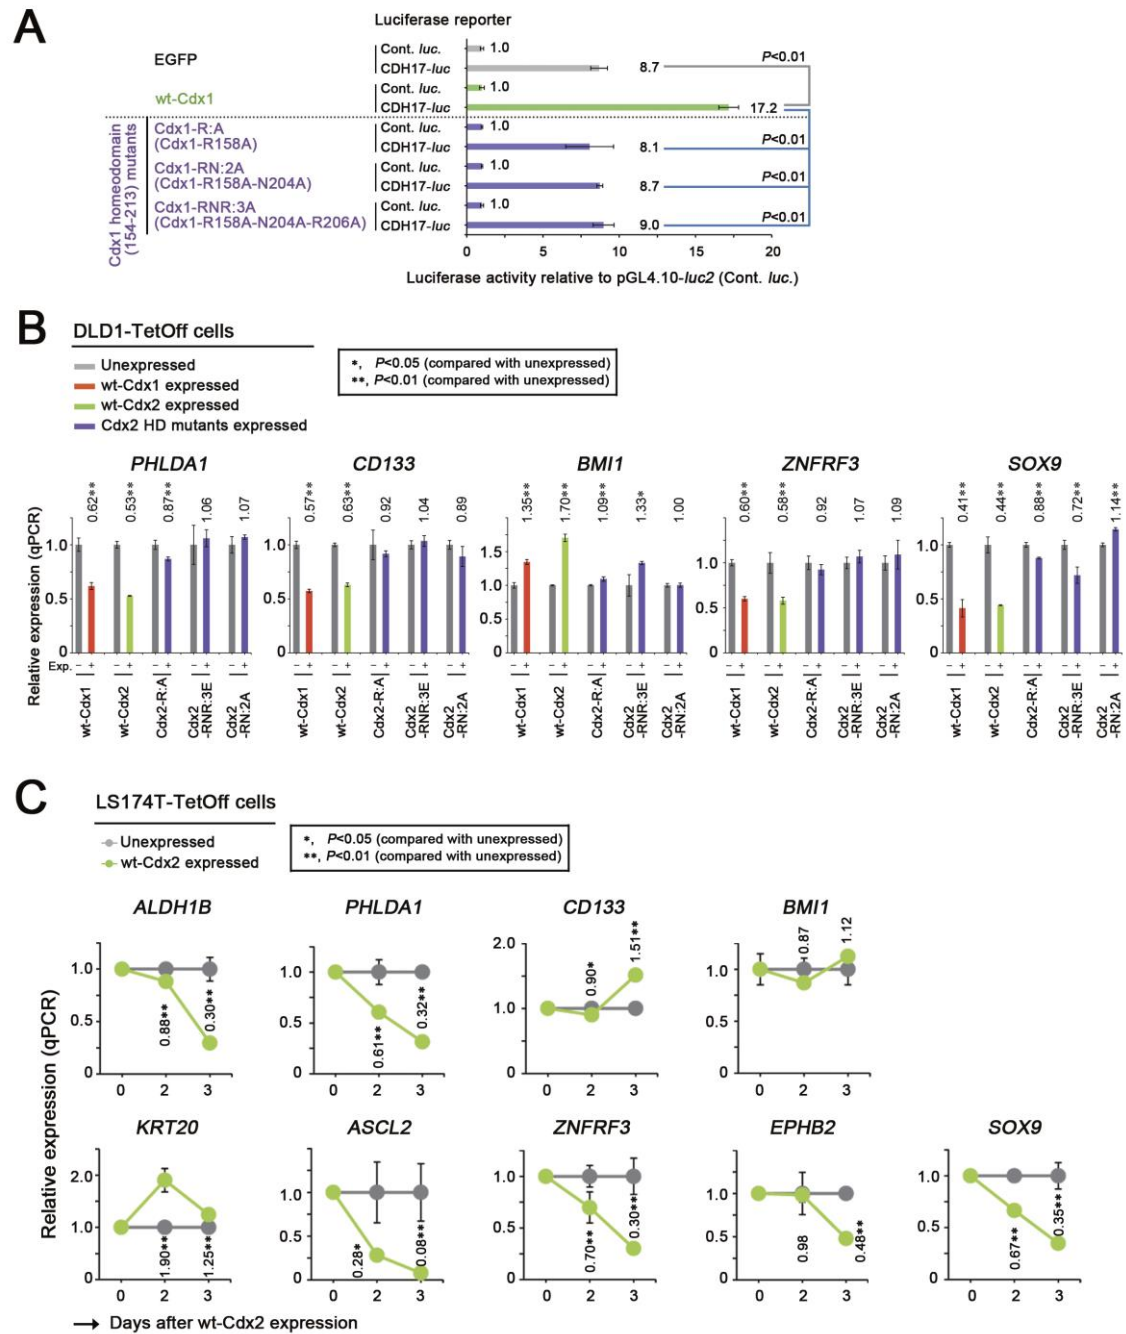

**Supplementary Fig. S3: Suppression of colon cancer cell stemness by CDX1 and CDX2.**

(A) Bar graph showing luciferase activities (mean ± SD) of the *CDH17 luc* reporter relative to those of the pGL4.10-*luc2* control upon expressing wt-Cdx1 or its homeodomain (HD) mutants. *P*-values were calculated using a Student's *t*-test (A–C).

**(B and C)** qPCR data showing the relative expression (mean  $\pm$  SD) of colon cancer stemness- or differentiation-related marker genes upon expression of wt-Cdx1 for 1 day or wt-Cdx2 or its homeodomain (HD) mutants for 2 days in DLD1-TetOff cells **(B)** and for 4 and 7 days in LS174T-TetOff cells **(C)**, when compared with those in cells without their expression.

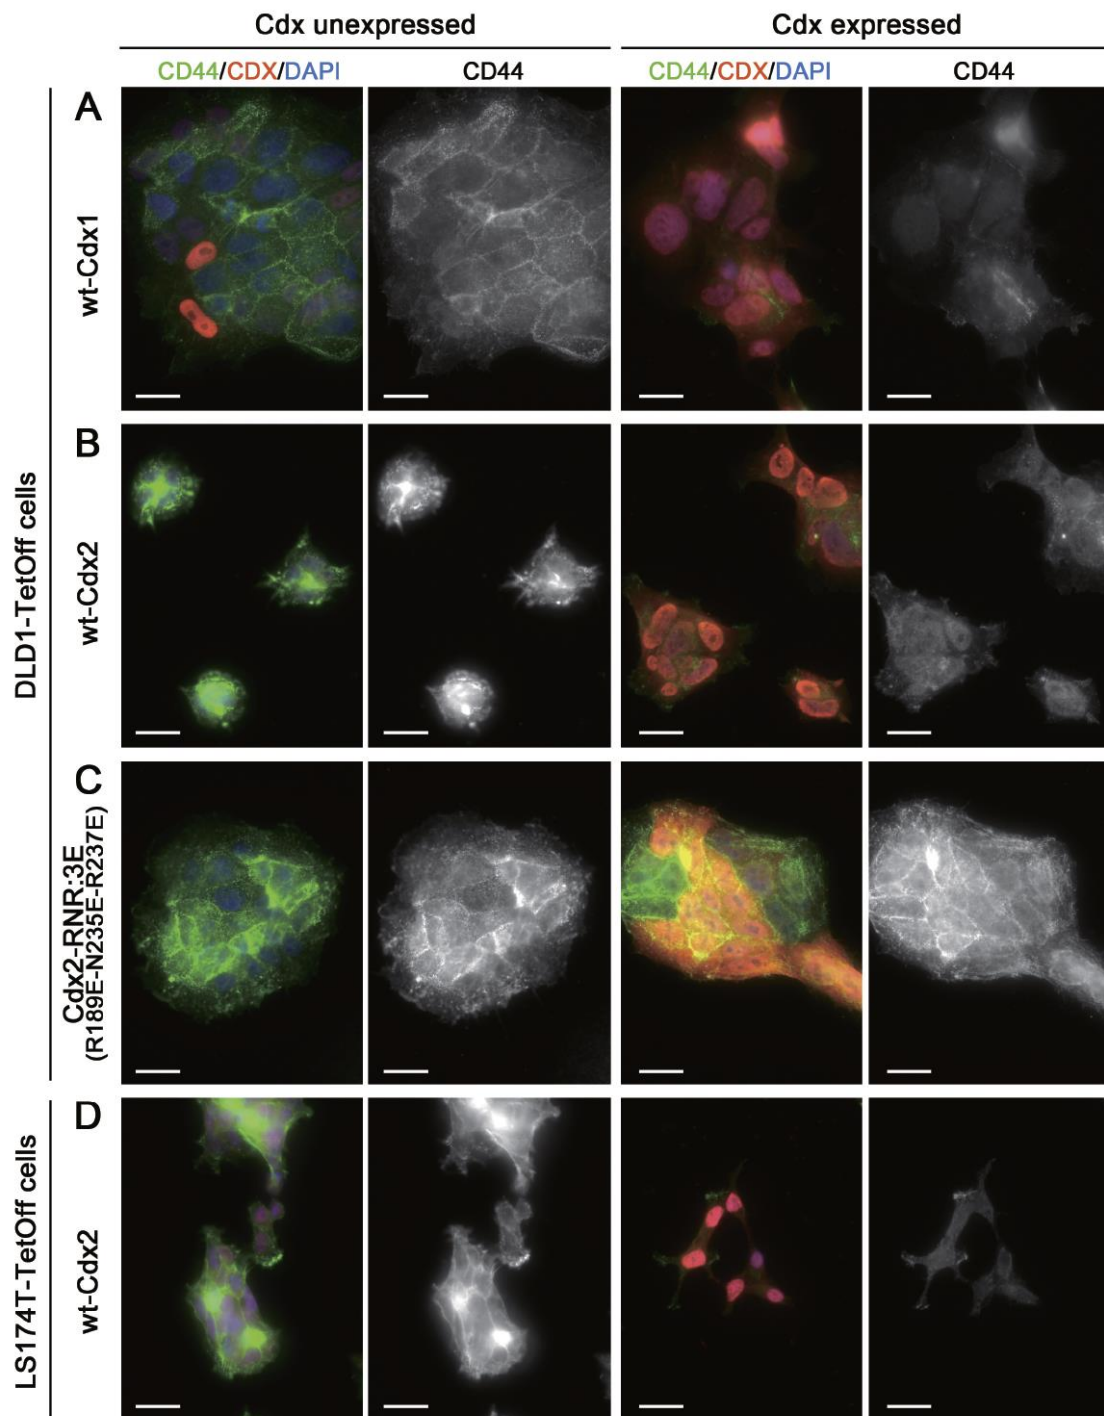

**Supplementary Fig. S4: Suppression of CD44 expression by CDX1 and CDX2.**

**(A–D)** Immunocytochemistry showing the expression of CD44 (green) and Cdx1/2 (red) upon expressing wt-Cdx1 **(A)**, wt-Cdx2 **(B, D)**, or Cdx2-RNR:3E

(**C**) for 2 days in DLD1-TetOff cells (**A–C**) and LS174T-TetOff cells (**D**). The cells were also stained with DAPI (blue).

$\alpha$ -CD44 (cis-*Apc*<sup>+/-</sup>-*Cdx1*<sup>+/-</sup> small intestinal tumors)

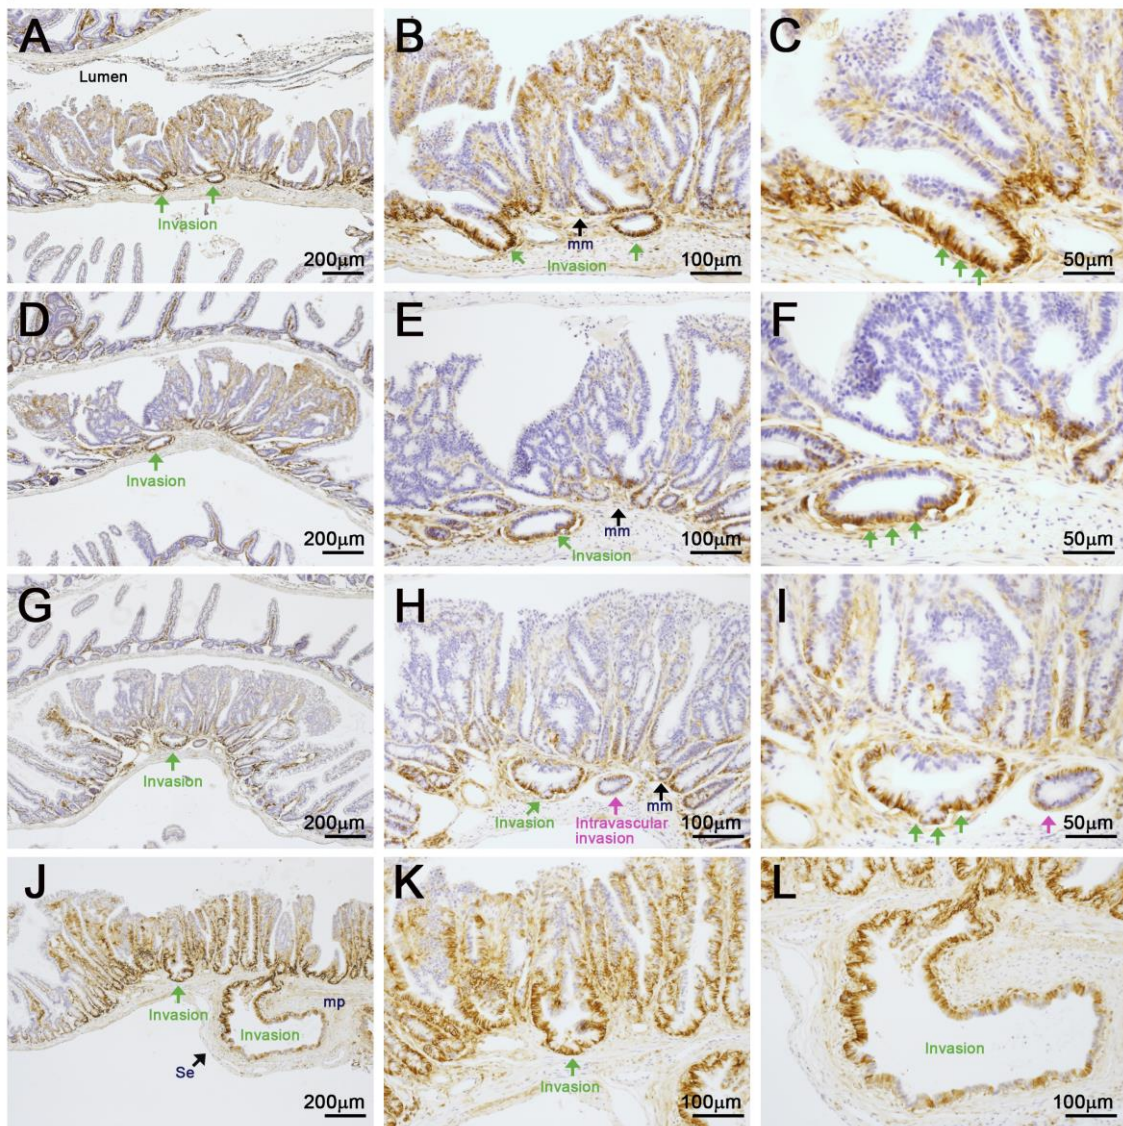

$\alpha$ -PCNA (cis-*Apc*<sup>+/-</sup>-*Cdx1*<sup>+/-</sup> small intestinal tumor)

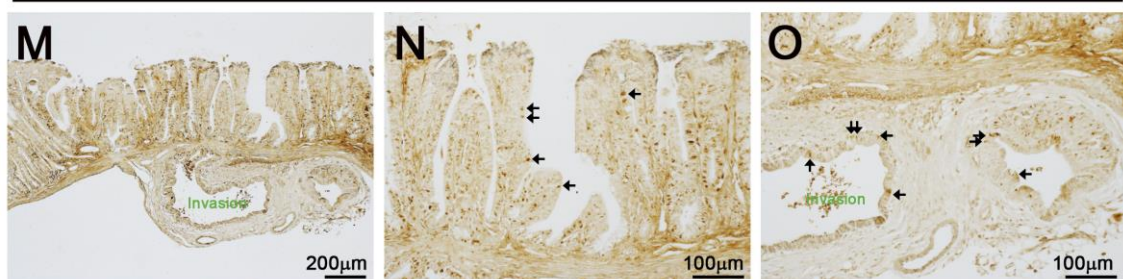

**Supplementary Fig. S5: Increased Cd44 expression in the leading cells of intestinal tumor invasions in cis-*Apc*<sup>+/-</sup>-*Cdx1*<sup>+/-</sup> mice.**

**(A–I)** Immunohistochemistry showing Cd44 expression (brown) in small-intestinal tumor invasions from *cis-Apc<sup>+/-</sup>Cdx1<sup>+/-</sup>* mice. Panels **(B)**, **(E)**, and **(H)** are magnified images of **(A)**, **(D)**, and **(G)**, respectively, and **(C)**, **(F)**, and **(I)** are magnified images of **(B)**, **(E)**, and **(H)**, respectively. The green arrows **(C, F, I)** indicate cells with higher Cd44 expression. The tumors were counterstained with hematoxylin (blue).

**(J–L)** Immunohistochemistry showing Cd44 expression (brown) in a small intestinal tumor with deep invasions from *cis-Apc<sup>+/-</sup>Cdx1<sup>+/-</sup>* mouse. Panels **(K)** and **(L)** are magnified images of **(J)**. Green arrows indicate cells with higher Cd44 expression. The tumors were also counterstained with hematoxylin (blue).

**(M–O)** Immunohistochemistry showing PCNA expression (brown) in a small intestinal tumor with deep invasions from the *cis-Apc<sup>+/-</sup>Cdx1<sup>+/-</sup>* mouse. Panels **(N)** and **(O)** are magnified images of **(M)**. Arrows indicate cells with higher PCNA expression.

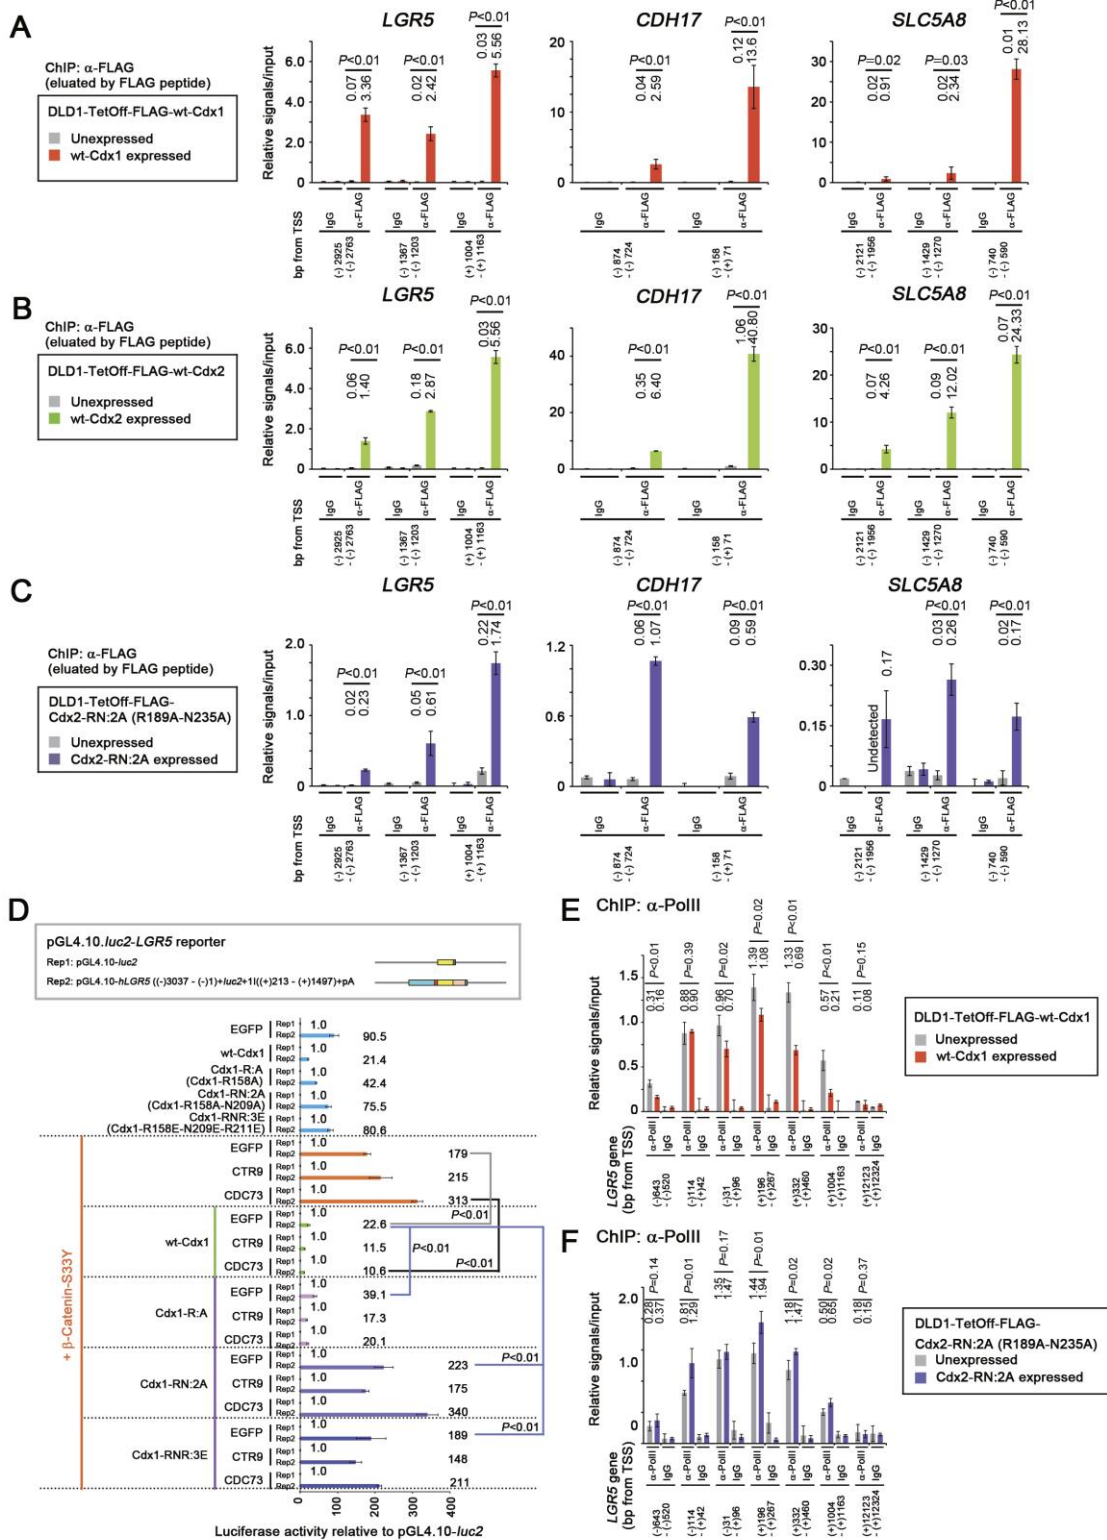

**Supplementary Fig. S6: Reduced occupancy of Pol II and PAF1 on *LGR5* upon expression of CDX1 and CDX2.**

**(A–C)** Bar graphs of ChIP-qPCR data showing the relative occupancy (mean  $\pm$  SD) of exogenously expressed FLAG-tagged **(A)** wt-Cdx1, **(B)** wt-Cdx2, and **(C)** Cdx2-RN:2A (Cdx2-R189A-N235A) at the indicated positions of the *LGR5* (left), *CDH17* (center), and *SLC5A8* (right) in DLD1-TetOff cells. CDX2-target genes *CDH17* and *SLC5A8* were used as positive controls. *P*-values were calculated using a Student's *t*-test **(A–F)**.

**(D)** Bar graph showing the luciferase activities (mean  $\pm$  SD) of the *LGR5 luc* reporter relative to those of the pGL4.10-*luc2* control upon expressing wt-Cdx1 or its HD mutants in 293T cells. Luciferase activity was determined 40 h after transfecting the *luc* reporter into the cells.

**(E and F)** Bar graphs of ChIP-qPCR data showing the relative occupancy (mean  $\pm$  SD) of Pol II at the indicated positions of *LGR5* upon expressing **(E)** wt-Cdx1 or **(F)** Cdx2-RN:2A (Cdx2-R189A-N235A) in DLD1-TetOff cells for 1 day.

## Supplementary figure S7

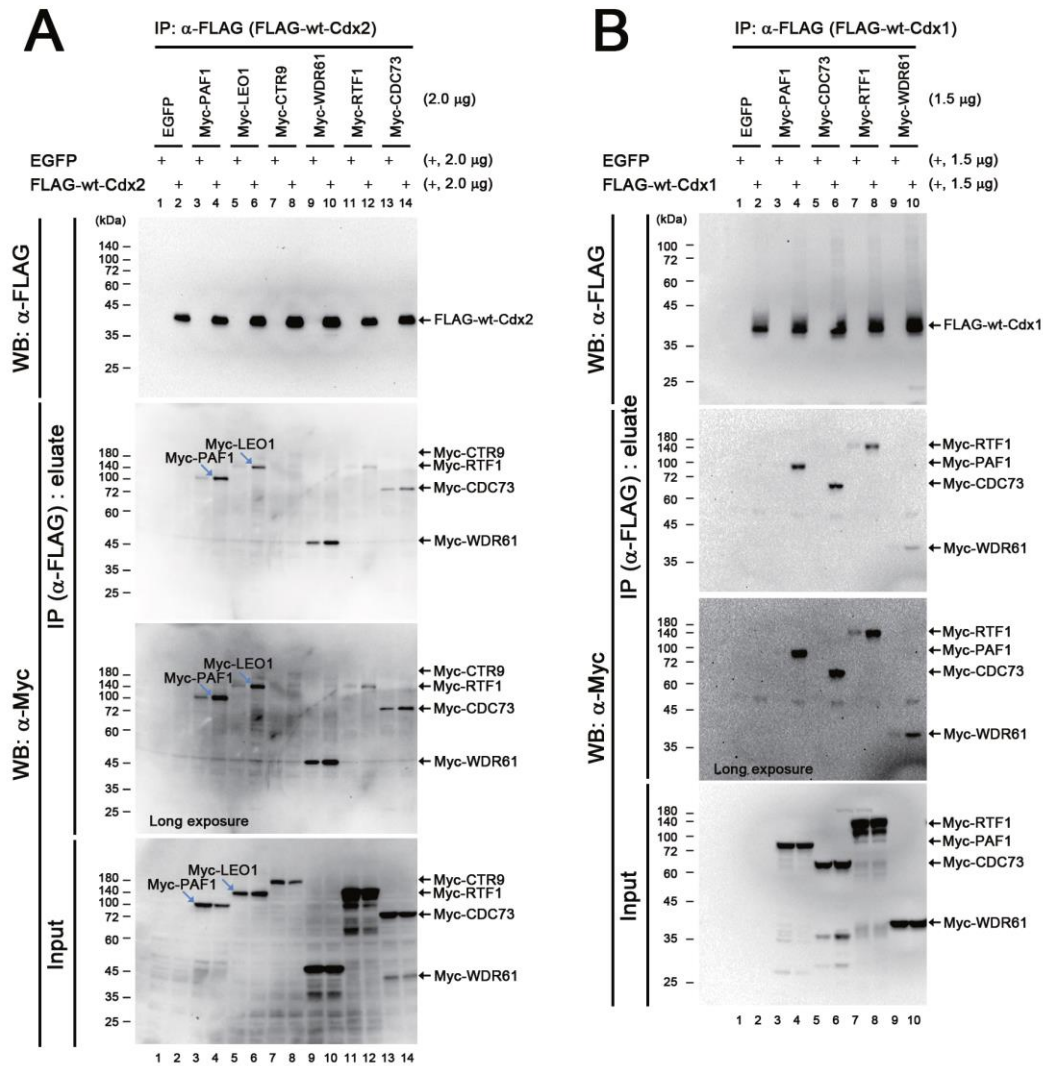

### Supplemental Fig S7: Suppression of the Pol II–DSIF–PAF1C complex formation by CDX1 and CDX2.

(A and B) Immunoblots of IP samples showing interactions of FLAG-tagged wt-Cdx2 (A) or wt-Cdx1 (B) with Myc-tagged PAF1C components and SPT5. After IP of FLAG-wt-Cdx2 (A) or FLAG-wt-Cdx1 (B), the co-immunoprecipitated Myc-tagged proteins were analyzed via immunoblotting. The amounts of plasmid DNA transfected are indicated on the right, and long exposure gel images are shown.

## Supplementary figure S8

**A**

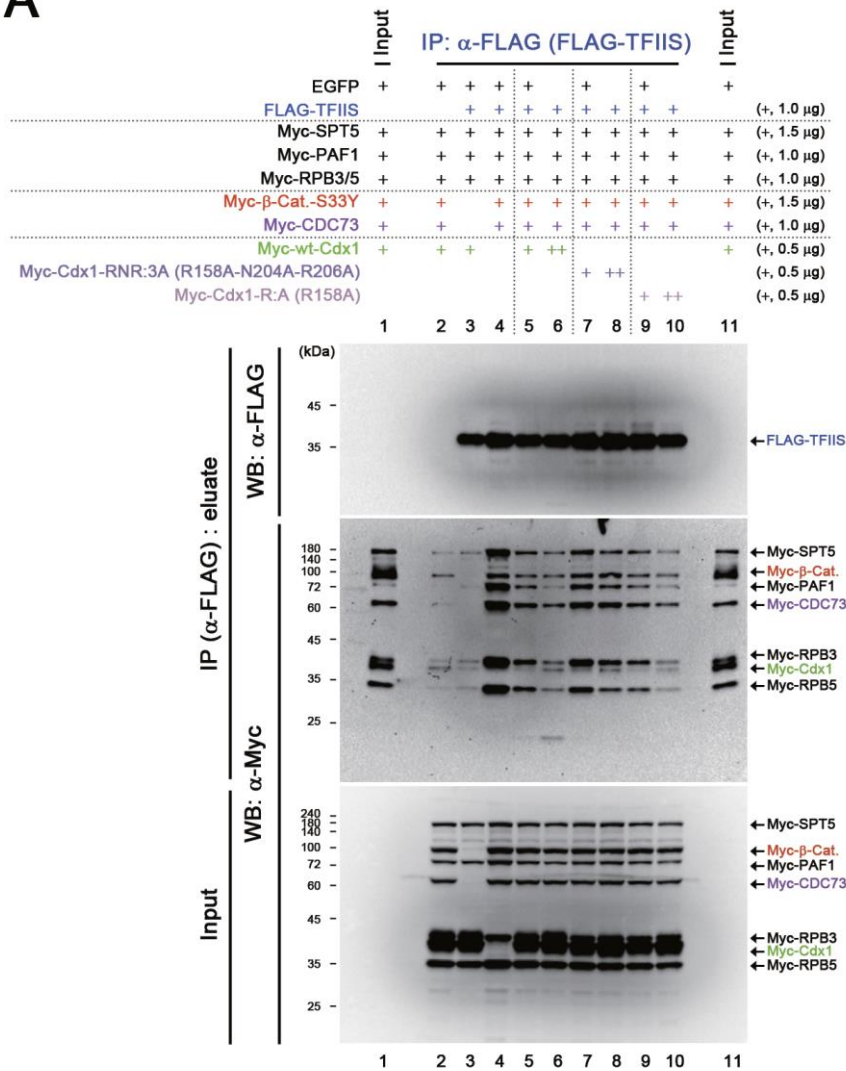

**Supplementary Fig. S8: Suppression of Pol II–DSIF–PAF1C complex formation by CDX1 via its homeodomain.**

**(A)** Immunoblots of IP samples showing the effects of wt-Cdx1 and its homeodomain (HD) mutant expression on  $\beta$ -catenin-S33Y ( $\beta$ -Cat.)-facilitated formation of a complex involving TFIIS, SPT5, PAF1, and RPBs. After IP of FLAG-TFIIS, the co-immunoprecipitated Myc-tagged proteins were analyzed via immunoblotting. The amounts of plasmid DNA transfected are indicated on the right.

A

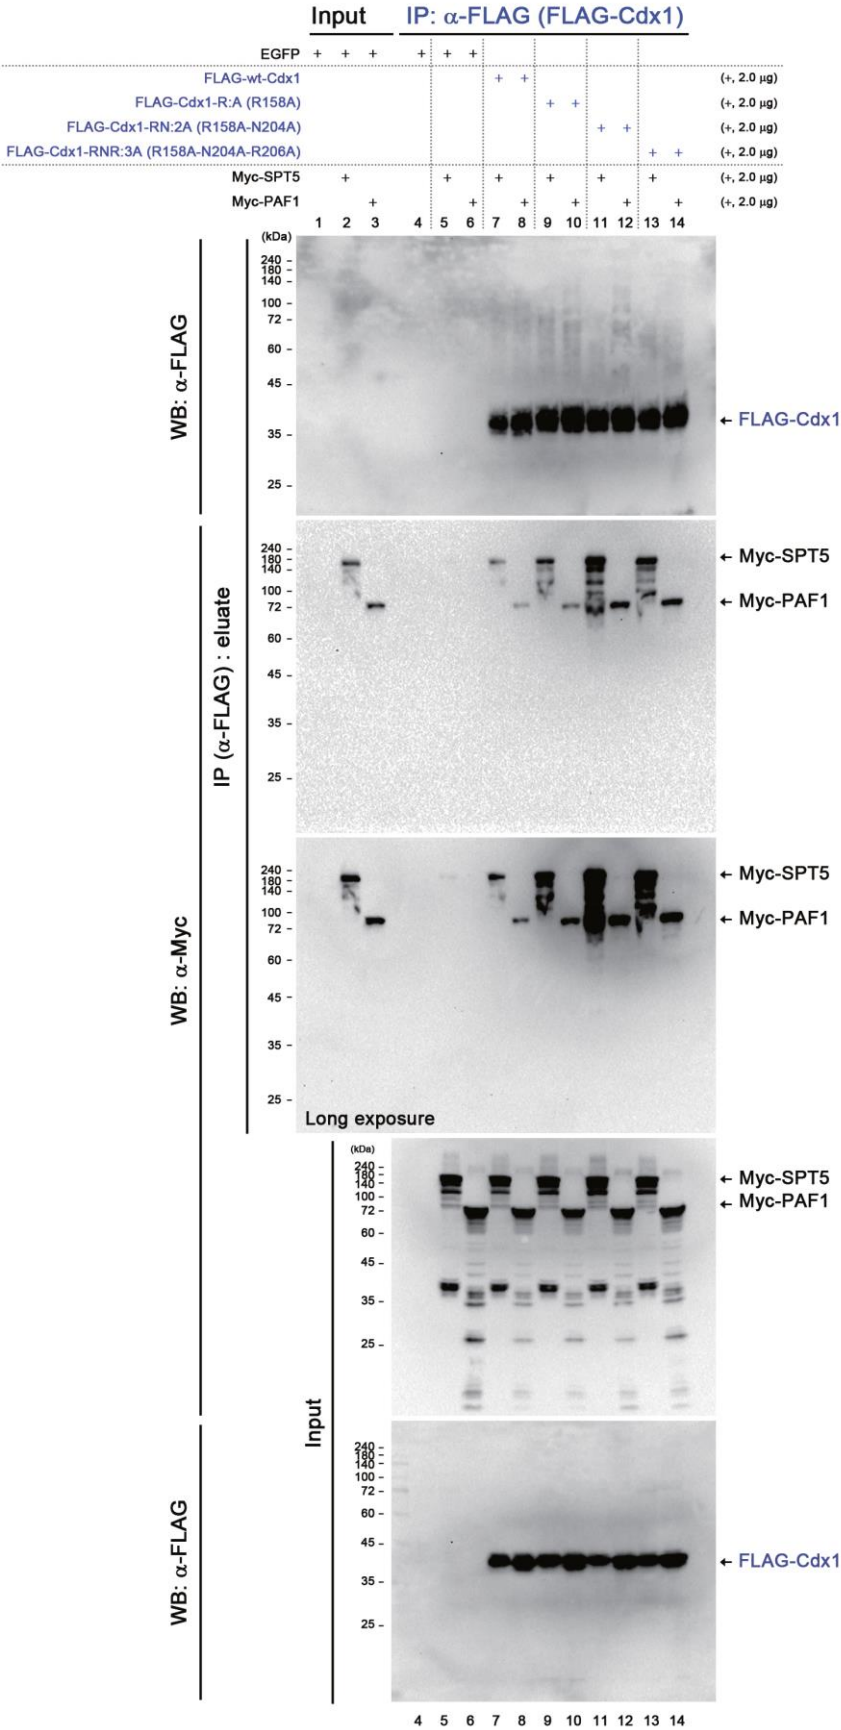

**Supplementary Fig. S9: Contribution of the homeodomain to the suppression of Pol II–DSIF–PAF1C complex formation by CDX1.**

**(A)** Immunoblots of IP samples showing interactions between SPT5 and Cdx1 (or its mutants) and between PAF1 and Cdx1 (or its mutants). After IP with FLAG-Cdx1, the co-immunoprecipitated Myc-tagged proteins were analyzed via immunoblotting. The amounts of plasmid DNA transfected are indicated on the right, and a long-exposure gel image is also shown.

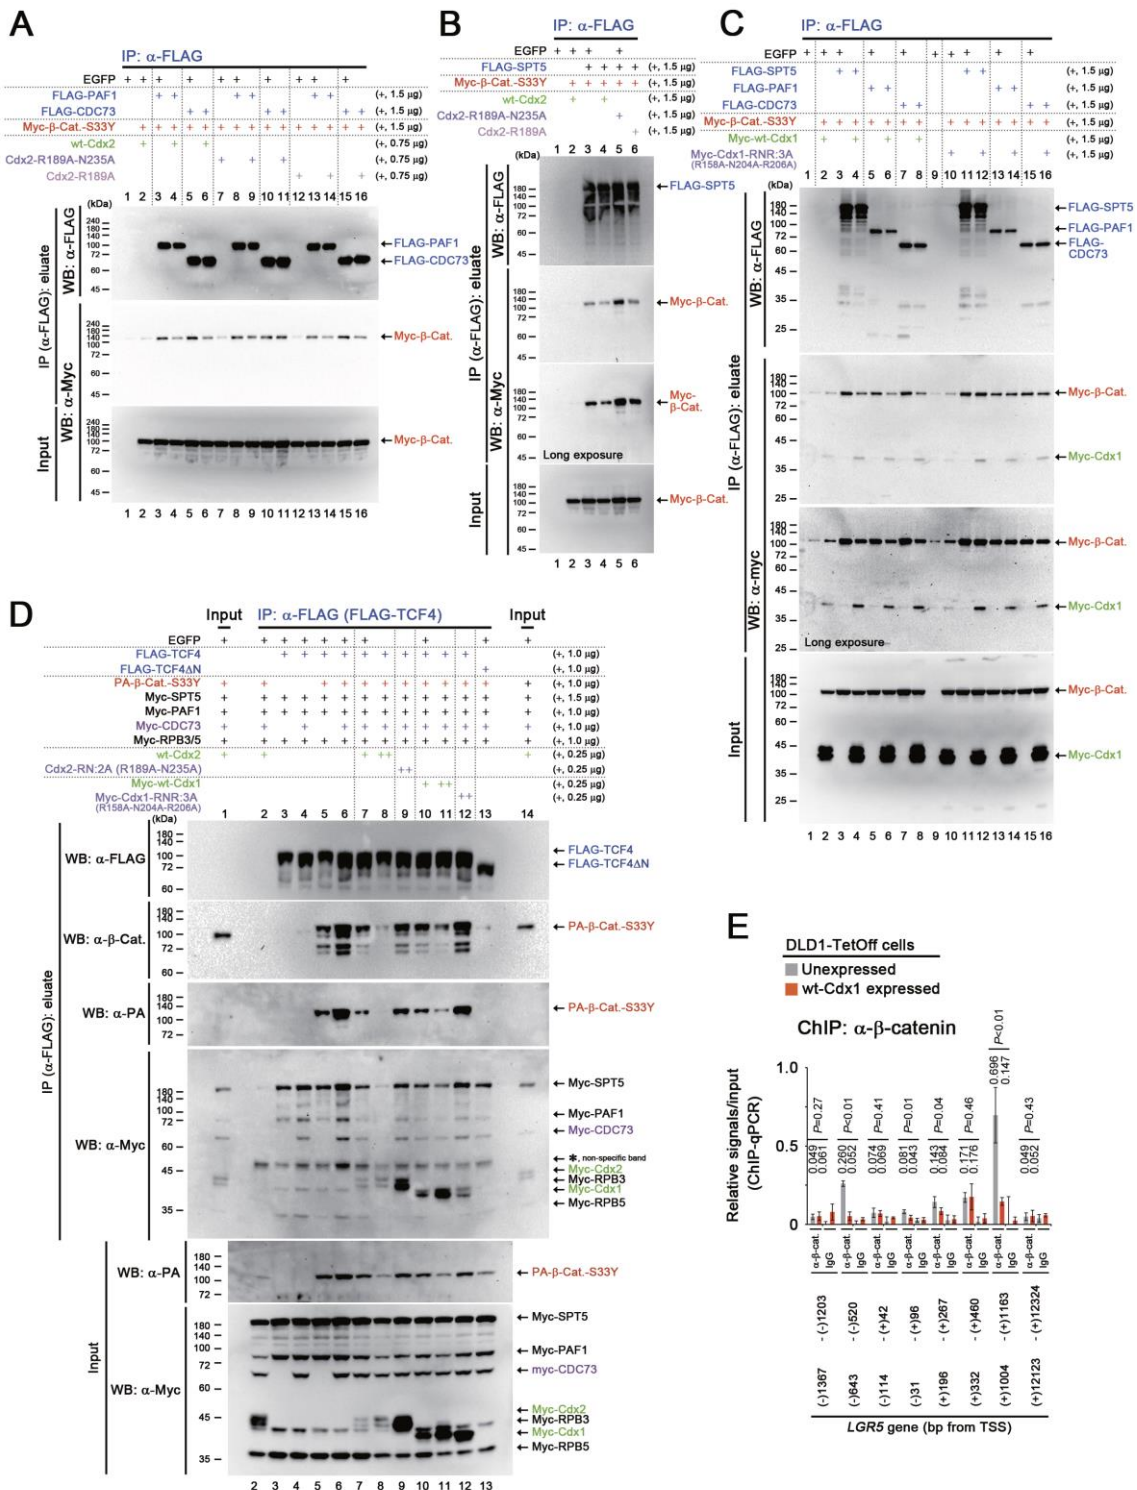

**Supplementary Fig. S10: Suppression of the interaction between  $\beta$ -catenin and PAF1C by CDX1 and CDX2.**

**(A and B)** Immunoblots of IP samples showing the effects of Cdx2 and its

homeodomain (HD) mutant expression on interactions between  $\beta$ -catenin-S33Y ( $\beta$ -Cat.) and **(A)** PAF1, CDC73, or **(B)** SPT5. After IP with **(A)** FLAG-PAF1, FLAG-CDC73, or **(B)** FLAG-SPT5, co-immunoprecipitated Myc-tagged  $\beta$ -catenin-S33Y was analyzed via immunoblotting. The amounts of plasmid DNA transfected are indicated on the right, and a long-exposure gel image is shown.

**(C)** Immunoblots of IP samples showing the effects of Cdx1 and its homeodomain (HD) mutant expression on interactions between  $\beta$ -catenin-S33Y ( $\beta$ -Cat.) and SPT5, PAF1 or CDC73. After IP with FLAG-SPT5, FLAG-PAF1, or FLAG-CDC73, the co-immunoprecipitated Myc-tagged  $\beta$ -catenin-S33Y was analyzed via immunoblotting. The amounts of the plasmid DNA transfected are indicated on the right, and a long-exposure gel image is shown.

**(D)** Immunoblots of IP samples showing the effects of wt-Cdx1/2 and their homeodomain (HD) mutant expression on the interaction of FLAG-tagged TCF4 with PA-tagged  $\beta$ -catenin-S33Y ( $\beta$ -Cat.), Myc-tagged SPT5, PAF1 components, and RPBs. Plasmid DNA expressing the indicated proteins were transfected into 293T cells, which were harvested on Day 2 for IP assay with FLAG-TCF4. The co-immunoprecipitated Myc-tagged proteins were analyzed via immunoblotting. The amounts of plasmid DNA transfected are indicated on the right. The asterisk denotes non-specific bands.

**(E)** Bar graph of ChIP-qPCR data showing the relative occupancy (mean  $\pm$  SD) of  $\beta$ -catenin at the indicated positions of *LGR5* after expressing wt-Cdx1 in DLD1-TetOff cells for 1 day. IgG was used as a negative control. *P*-values were calculated using a Student's *t*-test.

**Supplementary Table S1**

| <b>Summary of intestinal tumor invasion in <i>cis-Apc<sup>+/-</sup>Cdx1<sup>+/-</sup></i> and <i>Cdx2<sup>+/-</sup>-cis-Apc<sup>+/-</sup>Cdx1<sup>+/-</sup></i> mice</b> |             |                         |                         |                    |             |                |
|--------------------------------------------------------------------------------------------------------------------------------------------------------------------------|-------------|-------------------------|-------------------------|--------------------|-------------|----------------|
| Mouse information                                                                                                                                                        |             |                         | Small intestinal tumors |                    |             | Colonic tumors |
|                                                                                                                                                                          |             |                         | Depth of invasion       |                    |             | Invasion       |
| Genotype                                                                                                                                                                 | Age (weeks) | Number of mice analyzed | Submucosa               | Muscularis propria | Subserosa   |                |
| <i>cis-Apc<sup>+/-</sup>Cdx1<sup>+/-</sup></i>                                                                                                                           | 12          | 1                       | +                       | -                  | -           | -              |
|                                                                                                                                                                          | 14          | 1                       | +                       | +                  | +           | -              |
|                                                                                                                                                                          | 15          | 2                       | +                       | +                  | +           | -              |
|                                                                                                                                                                          | 15          | 1                       | +                       | +                  | -           | -              |
|                                                                                                                                                                          | 16          | 2                       | +                       | +                  | +           | -              |
|                                                                                                                                                                          | 17          | 4                       | +                       | +                  | +           | -              |
|                                                                                                                                                                          | 18          | 2                       | +                       | +                  | -           | -              |
|                                                                                                                                                                          | 18          | 1                       | +                       | +                  | +           | -              |
|                                                                                                                                                                          | 19          | 2                       | +                       | +                  | +           | -              |
|                                                                                                                                                                          | 20          | 1                       | +                       | +                  | +           | -              |
|                                                                                                                                                                          | 21          | 1                       | +                       | +                  | +           | -              |
| Total                                                                                                                                                                    | 12-21       | 18                      | 100% (18/18)            | 94% (17/18)        | 78% (14/18) | 0% (0/18)      |
| <i>Cdx2<sup>+/-</sup>-cis-Apc<sup>+/-</sup>Cdx1<sup>+/-</sup></i>                                                                                                        | 10          | 1                       | N.D.                    |                    |             | +              |
|                                                                                                                                                                          | 15          | 1                       | N.D.                    |                    |             | +              |
|                                                                                                                                                                          | 17          | 2                       | N.D.                    |                    |             | +              |
|                                                                                                                                                                          | 19          | 1                       | N.D.                    |                    |             | +              |
|                                                                                                                                                                          | 23          | 1                       | N.D.                    |                    |             | +              |
| Total                                                                                                                                                                    | 10-23       | 6                       | N.D.                    |                    |             | 100% (6/6)     |
| <i>Apc<sup>+/-</sup></i>                                                                                                                                                 | 12-20       | 13                      | 0% (0/13)               | 0% (0/13)          | 0% (0/13)   | 0% (0/13)      |
| N.D., not determined.<br>Note that development of small intestinal tumors was strongly suppressed by the <i>Cdx2</i> mutation as reported previously [10].               |             |                         |                         |                    |             |                |

The depth of invasion of the small intestinal and colonic tumors is summarized for each genotype. The + sign indicates positive invasion, whereas the - sign indicates negative invasion. The number and age of the mice analyzed are also provided. The percentages of mice positive for invasion are shown at the bottom. We analyzed 18 *cis-Apc<sup>+/-</sup>Cdx1<sup>+/-</sup>*, 6 *Cdx2<sup>+/-</sup>-cis-Apc<sup>+/-</sup>Cdx1<sup>+/-</sup>* mice, and 13 *Apc<sup>+/-</sup>* mice.

**Supplementary Table S2**

**The 20 genes whose expression levels were reduced the most upon inducing Cdx1 or Cdx2 in DLD1-TetOff cells**

|                |                  | Signal intensities             |        |               |                                |       |               |                                |        |               |                                  |
|----------------|------------------|--------------------------------|--------|---------------|--------------------------------|-------|---------------|--------------------------------|--------|---------------|----------------------------------|
|                |                  | 12 h expression of <i>Cdx1</i> |        |               | 24 h expression of <i>Cdx1</i> |       |               | 24 h expression of <i>Cdx2</i> |        |               |                                  |
|                |                  | Unexp                          | Exp    | Exp/<br>Unexp | Unexp                          | Exp   | Exp/<br>Unexp | Unexp                          | Exp    | Exp/<br>Unexp |                                  |
| Gene<br>number | Gene symbol      | Cy5                            | Cy3    | Cy3/<br>Cy5   | Cy5                            | Cy3   | Cy3/<br>Cy5   | Cy5                            | Cy3    | Cy3/<br>Cy5   | Note                             |
| 1              | <i>ID1</i>       | 2974.5                         | 376.3  | 0.127         | 2179.7                         | 247.6 | 0.114         | 1759.3                         | 440.4  | 0.250         | Related to colon cancer stemness |
| 2              | <i>GDF15</i>     | 2790.6                         | 377.4  | 0.135         | 3076.6                         | 256.1 | 0.083         | 2104.9                         | 611.4  | 0.290         |                                  |
| 3              | <i>CLDN4</i>     | 2169.8                         | 312.1  | 0.144         | 1426.5                         | 181.4 | 0.127         | 1705.6                         | 505.5  | 0.296         |                                  |
| 4              | <i>TNFRSF12A</i> | 1327.3                         | 205.1  | 0.155         | 580.0                          | 121.7 | 0.210         | 1034.2                         | 363.9  | 0.352         |                                  |
| 5              | <i>DOK7</i>      | 126.7                          | 21.0   | 0.166         | 80.7                           | 18.9  | 0.234         | 108.9                          | 39.4   | 0.362         |                                  |
| 6              | <i>MYC</i>       | 1025.9                         | 170.4  | 0.166         | 673.2                          | 84.5  | 0.126         | 443.4                          | 102.0  | 0.230         | Related to colon cancer stemness |
| 7              | <i>TNFRSF12A</i> | 2376.9                         | 456.0  | 0.192         | 1032.6                         | 236.7 | 0.229         | 1772.2                         | 820.3  | 0.463         |                                  |
| 8              | <i>RHOB</i>      | 403.7                          | 81.2   | 0.201         | 247.7                          | 56.7  | 0.229         | 115.3                          | 55.8   | 0.485         |                                  |
| 9              | <i>ATAD4</i>     | 77.2                           | 15.7   | 0.203         | 98.1                           | 12.5  | 0.128         | 62.3                           | 23.0   | 0.370         |                                  |
| 10             | <i>IER5L</i>     | 26.9                           | 5.5    | 0.205         | 16.8                           | 10.5  | 0.625         | 11.1                           | 9.7    | 0.873         |                                  |
| 11             | <i>SLC2A1</i>    | 6059.5                         | 1273.3 | 0.210         | 3108.9                         | 770.3 | 0.248         | 4379.1                         | 1470.3 | 0.336         |                                  |
| 12             | <i>RHOB</i>      | 145.5                          | 32.3   | 0.222         | 118.9                          | 33.2  | 0.279         | 45.9                           | 26.7   | 0.582         |                                  |
| 13             | <i>SCNN1A</i>    | 13.0                           | 2.9    | 0.222         | 12.6                           | 3.7   | 0.297         | 9.6                            | 5.3    | 0.558         |                                  |
| 14             | <i>IGFL4</i>     | 423.0                          | 95.2   | 0.225         | 236.6                          | 30.3  | 0.128         | 131.1                          | 33.3   | 0.254         |                                  |
| 15             | <i>RGS16</i>     | 144.1                          | 33.4   | 0.232         | 69.8                           | 22.4  | 0.322         | 67.7                           | 23.5   | 0.348         |                                  |
| 16             | <i>HOXA11</i>    | 146.9                          | 34.1   | 0.232         | 102.7                          | 14.6  | 0.142         | 116.0                          | 45.8   | 0.395         |                                  |
| 17             | <i>ID3</i>       | 1279.2                         | 300.7  | 0.235         | 844.1                          | 215.5 | 0.255         | 738.1                          | 294.5  | 0.399         | Related to colon cancer stemness |
| 18             | <i>IER3</i>      | 1719.0                         | 404.8  | 0.236         | 1088.1                         | 316.8 | 0.291         | 1273.6                         | 596.0  | 0.468         |                                  |
| 19             | <i>KIT</i>       | 263.2                          | 64.4   | 0.245         | 287.9                          | 46.2  | 0.161         | 127.1                          | 46.5   | 0.366         |                                  |
| 20             | <i>EFNA1</i>     | 636.2                          | 168.2  | 0.264         | 356.2                          | 99.9  | 0.281         | 489.9                          | 199.1  | 0.406         |                                  |

The intensities of the Cy5 and Cy3 signals, along with their ratios (Cy3/Cy5), after 12 and 24 h of wt-Cdx1 expression or 24 h of wt-Cdx2 expression in DLD1-TetOff cells are shown. The genes are listed according to the most significant reduction in expression after 12 h of wt-Cdx1 expression.

Abbreviations: Exp, expressed; Unexp, unexpressed.

**Supplementary Table S3**

| Levels of <i>CDX1</i> and <i>CDX2</i> in human CRC organoids with high <i>LGR5</i> levels |               |                  |            |                 |            |                              |         |
|-------------------------------------------------------------------------------------------|---------------|------------------|------------|-----------------|------------|------------------------------|---------|
| CRC organoid 7 with knock-in of LGR5-EGFP_1                                               |               |                  |            |                 |            |                              |         |
|                                                                                           |               | LGR5-EGFP High_1 |            | LGR5-EGFP Low_1 |            | Relative level               |         |
|                                                                                           | GEO number    | GSM2205593       | Expression | GSM2205594      | Expression | (high/low <i>LGR5</i> cells) |         |
| Gene                                                                                      | Annotation    | Raw value        | level      | Raw value       | level      |                              | Average |
| <i>LGR5</i>                                                                               | 11733962_a_at | 1.071            | 11.789     | −1.239          | 0.058      | 204.198                      | 1.022   |
| <i>CDX1</i>                                                                               | 11732512_a_at | 0.112            | 1.294      | 0.143           | 1.391      | 0.931                        |         |
| <i>CDX1</i>                                                                               | 11732513_a_at | 0.157            | 1.435      | 0.110           | 1.288      | 1.114                        |         |
| <i>CDX2</i>                                                                               | 11731754_at   | 0.124            | 1.332      | 0.326           | 2.118      | 0.629                        |         |
| CRC organoid 7 with knock-in of LGR5-EGFP_2                                               |               |                  |            |                 |            |                              |         |
|                                                                                           |               | LGR5-EGFP High_1 |            | LGR5-EGFP Low_1 |            | Relative level               |         |
|                                                                                           | GEO number    | GSM2205595       | Expression | GSM2205596      | Expression | (high/low <i>LGR5</i> cells) |         |
| Gene                                                                                      | Annotation    | Raw value        | level      | Raw value       | level      |                              | Average |
| <i>LGR5</i>                                                                               | 11733962_a_at | 1.221            | 16.616     | 0.370           | 2.343      | 7.091                        | 0.753   |
| <i>CDX1</i>                                                                               | 11732512_a_at | 0.604            | 4.019      | 0.761           | 5.771      | 0.696                        |         |
| <i>CDX1</i>                                                                               | 11732513_a_at | 0.844            | 6.981      | 0.935           | 8.614      | 0.810                        |         |
| <i>CDX2</i>                                                                               | 11731754_at   | 0.776            | 5.970      | 0.768           | 5.858      | 1.019                        |         |
| CRC organoid 12 with knock-in of LGR5-EGFP_1                                              |               |                  |            |                 |            |                              |         |
|                                                                                           |               | LGR5-EGFP High_1 |            | LGR5-EGFP Low_1 |            | Relative level               |         |
|                                                                                           | GEO number    | GSM2205597       | Expression | GSM2205598      | Expression | (high/low <i>LGR5</i> cells) |         |
| Gene                                                                                      | Annotation    | Raw value        | level      | Raw value       | level      |                              | Average |
| <i>LGR5</i>                                                                               | 11733962_a_at | 0.722            | 5.269      | −0.976          | 0.106      | 49.840                       | 0.517   |
| <i>CDX1</i>                                                                               | 11732512_a_at | −1.006           | 0.099      | −0.592          | 0.256      | 0.385                        |         |
| <i>CDX1</i>                                                                               | 11732513_a_at | −0.677           | 0.210      | −0.489          | 0.324      | 0.649                        |         |
| <i>CDX2</i>                                                                               | 11731754_at   | −0.437           | 0.365      | −0.396          | 0.402      | 0.909                        |         |
| CRC organoid 12 with knock-in of LGR5-EGFP_2                                              |               |                  |            |                 |            |                              |         |
|                                                                                           |               | LGR5-EGFP High_1 |            | LGR5-EGFP Low_1 |            | Relative level               |         |
|                                                                                           | GEO number    | GSM2205599       | Expression | GSM2205600      | Expression | (high/low <i>LGR5</i> cells) |         |
| Gene                                                                                      | Annotation    | Raw value        | level      | Raw value       | level      |                              | Average |
| <i>LGR5</i>                                                                               | 11733962_a_at | 0.981            | 9.572      | −1.693          | 0.020      | 472.368                      | 0.595   |
| <i>CDX1</i>                                                                               | 11732512_a_at | −0.844           | 0.143      | −0.669          | 0.214      | 0.668                        |         |
| <i>CDX1</i>                                                                               | 11732513_a_at | −0.714           | 0.193      | −0.433          | 0.369      | 0.523                        |         |
| <i>CDX2</i>                                                                               | 11731754_at   | −0.108           | 0.781      | 0.108           | 1.281      | 0.609                        |         |
| CRC organoid 28 with knock-in of LGR5-EGFP_1                                              |               |                  |            |                 |            |                              |         |
|                                                                                           |               | LGR5-EGFP High_1 |            | LGR5-EGFP Low_1 |            | Relative level               |         |
|                                                                                           | GEO number    | GSM2205601       | Expression | GSM2205602      | Expression | (high/low <i>LGR5</i> cells) |         |
| Gene                                                                                      | Annotation    | Raw value        | level      | Raw value       | level      |                              | Average |
| <i>LGR5</i>                                                                               | 11733962_a_at | 0.495            | 3.123      | −1.323          | 0.048      | 65.679                       | 1.182   |
| <i>CDX1</i>                                                                               | 11732512_a_at | −0.112           | 0.773      | −0.148          | 0.712      | 1.085                        |         |
| <i>CDX1</i>                                                                               | 11732513_a_at | −0.110           | 0.776      | −0.217          | 0.607      | 1.280                        |         |
| <i>CDX2</i>                                                                               | 11731754_at   | −0.332           | 0.466      | −0.228          | 0.592      | 0.787                        |         |

*CDX1* and *CDX2* expression levels were analyzed in human CRC organoids with high and low *LGR5* expression levels, using expression data deposited in GEO (accession numbers GSM2205593–GSM2205602) reported by Shimokawa *et al.*, *Nature* 2017 **545** 187-194 (Ref. 48).
